# Supplementary material for: Sunflower Growth and Grain Yield under Different Tillage Systems and Sources of Organic Manure on Contrasting Soil Types in Limpopo Province of South Africa
Source: MDPI journal article supplement (doi:10.3390/agronomy14040857), 2024-04-19
Supplement: s1 [file s1]

**Table S1.** ANOVA on the effect of cropping season, tillage system and manure rate on sunflower grain yield (GY), head diameter (HD), head dry matter (HDM), 100 seed weight, aboveground dry matter (ADM), leaf area index (LAI), plant height (PH) and stem girth (SG) at flower bud stage (FBS), flowering stage (FS) and maturity stage (MS) during 2021/2022 and 2022/2023 cropping season at Syferkuil.

| Sunflower Parameters | Factors              |                     |                  |        |        |        |          |
|----------------------|----------------------|---------------------|------------------|--------|--------|--------|----------|
|                      | Cropping season (CS) | Tillage System (TS) | Manure Rate (MR) | CS×TS  | CS×MR  | TS×MR  | CS×TS×MR |
| GY                   | 0.0111               | 0.0001              | 0.0001           | 0.2976 | 0.3057 | 0.6886 | 0.7668   |
| HD                   | 0.0001               | 0.0001              | 0.0001           | 0.0159 | 0.1118 | 0.0001 | 0.7513   |
| HDM                  | 0.0001               | 0.0001              | 0.0001           | 0.0001 | 0.0001 | 0.2987 | 0.8779   |
| 100 seed weight      | 0.1379               | 0.0755              | 0.3085           | 0.6466 | 0.4421 | 0.7769 | 0.8301   |
| ADM (FBS)            | 0.0001               | 0.0001              | 0.0001           | 0.0408 | 0.0001 | 0.0602 | 0.0445   |
| ADM (FS)             | 0.0001               | 0.0001              | 0.0001           | 0.0001 | 0.0001 | 0.8947 | 0.3934   |
| ADM (MS)             | 0.0001               | 0.0001              | 0.0001           | 0.0001 | 0.2738 | 0.3988 | 0.2226   |
| LAI (FBS)            | 0.0021               | 0.0026              | 0.0001           | 0.2200 | 0.0315 | 0.7555 | 0.6410   |
| LAI (FS)             | 0.0098               | 0.0263              | 0.0001           | 0.0992 | 0.0195 | 0.8086 | 0.5260   |
| LAI (MS)             | 0.0492               | 0.7432              | 0.7636           | 0.5944 | 0.5857 | 0.9689 | 0.8993   |
| PH (FBS)             | 0.9559               | 0.3318              | 0.0001           | 0.3798 | 0.1140 | 0.5850 | 0.9705   |
| PH (FS)              | 0.0001               | 0.0050              | 0.0001           | 0.0014 | 0.7582 | 0.5781 | 0.6538   |
| PH (MS)              | 0.0001               | 0.0181              | 0.0001           | 0.0157 | 0.6857 | 0.6638 | 0.7233   |
| SG (FBS)             | 0.0593               | 0.0966              | 0.0001           | 0.6859 | 0.5610 | 0.4857 | 0.9110   |
| SG (FS)              | 0.0083               | 0.2636              | 0.0001           | 0.2473 | 0.8959 | 0.3708 | 0.3669   |
| SG (MS)              | 0.0733               | 0.1810              | 0.0001           | 0.4925 | 0.7666 | 0.3433 | 0.5998   |

**Table S2.** ANOVA on the effect of cropping season, tillage system and manure rate on sunflower grain yield (GY), head diameter (HD), head dry matter (HDM), 100 seed weight, aboveground dry matter (ADM), leaf area index (LAI), plant height (PH) and stem girth (SG) at flower bud stage (FBS), flowering stage (FS) and maturity stage (MS) during 2021/2022 and 2022/2023 cropping season at UNIVEN.

| Sunflower Parameters | Factors              |                     |                  |        |        |        |          |
|----------------------|----------------------|---------------------|------------------|--------|--------|--------|----------|
|                      | Cropping season (CS) | Tillage System (TS) | Manure Rate (MR) | CS×TS  | CS×MR  | TS×MR  | CS×TS×MR |
| GY                   | 0.0046               | 0.0005              | 0.0010           | 0.6630 | 0.9072 | 0.9352 | 0.9723   |
| HD                   | 0.0332               | 0.0001              | 0.0001           | 0.7206 | 0.7050 | 0.0001 | 0.7933   |
| HDM                  | 0.0001               | 0.6089              | 0.0001           | 0.0135 | 0.1193 | 0.5255 | 0.8964   |
| 100 seed weight      | 0.2811               | 0.9146              | 0.4306           | 0.5384 | 0.6676 | 0.9469 | 0.7667   |
| ADM (FBS)            | 0.0565               | 0.0001              | 0.0001           | 0.5364 | 0.859  | 0.2352 | 0.8026   |
| ADM (FS)             | 0.035                | 0.0001              | 0.0001           | 0.0647 | 0.6120 | 0.5407 | 0.2613   |
| ADM (MS)             | 0.0001               | 0.0001              | 0.0001           | 0.0576 | 0.7124 | 0.5559 | 0.6553   |
| LAI (FBS)            | 0.4738               | 0.0004              | 0.0001           | 0.9981 | 0.0136 | 0.4380 | 0.9874   |
| LAI (FS)             | 0.0428               | 0.0001              | 0.0001           | 0.0001 | 0.0001 | 0.1795 | 0.9721   |
| LAI (MS)             | 0.0001               | 0.0001              | 0.0001           | 0.0001 | 0.0082 | 0.3969 | 0.9224   |
| PH (FBS)             | 0.0042               | 0.0001              | 0.0001           | 0.1251 | 0.2497 | 0.0066 | 0.9744   |
| PH (FS)              | 0.0040               | 0.0001              | 0.0001           | 0.2351 | 0.3782 | 0.5394 | 0.6283   |
| PH (MS)              | 0.0241               | 0.0001              | 0.0001           | 0.1244 | 0.0725 | 0.9251 | 0.8007   |
| SG (FBS)             | 0.0001               | 0.0001              | 0.0001           | 0.2593 | 0.8011 | 0.1103 | 0.6448   |
| SG (FS)              | 0.0001               | 0.0001              | 0.0001           | 0.0086 | 0.0093 | 0.1228 | 0.5652   |
| SG (MS)              | 0.2480               | 0.0001              | 0.0001           | 0.2842 | 0.0189 | 0.8537 | 0.3220   |
